# Supplementary material for: A novel curcumin analog inhibits canonical and non-canonical functions of telomerase through STAT3 and NF-κB inactivation in colorectal cancer cells
Source: PubMed Central journal article supplement (PMC6642039; doi:10.18632/oncotarget.27000), 2019-07-16
Supplement: oncotarget-10-4516-s001.pdf [file oncotarget-10-4516-s001.pdf]

## **A novel curcumin analog inhibits canonical and non-canonical functions of telomerase through STAT3 and NF- $\kappa$ B inactivation in colorectal cancer cells**

### **SUPPLEMENTARY MATERIALS**

**Supplementary Table 1: Ingenuity Pathway Analysis (IPA) data of HCT116 treated with compound 19**  
See Supplementary Table 1

**Supplementary Table 2: Gene Ontology (GO) analysis data of HCT116 treated with compound 19**  
See Supplementary Table 2

**Supplementary Table 3: Ingenuity Pathway Analysis (IPA) data of DLD1 treated with compound 19**  
See Supplementary Table 3

**Supplementary Table 4: Gene Ontology (GO) analysis data of DLD1 treated with compound 19**  
See Supplementary Table 4
